# Supplementary material for: Rooting and plant density strongly determine greenhouse gas budgetof water hyacinth (&lt;i&gt;Eichhornia crassipes&lt;/i&gt;) mats
Source: Copernicus journal article supplement (doi:10.5194/bg-2016-297), 2016-08-24
Supplement: Supplementary file [file bg-2016-297-AC2-supplement.pdf]

## Supporting Information

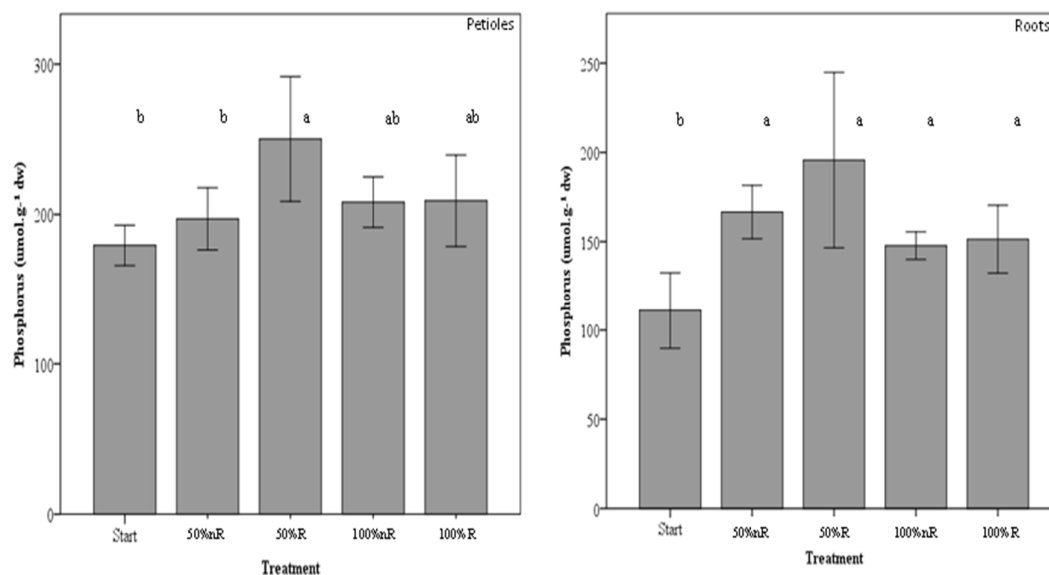

Figure S1. Mean P concentrations ( $\pm$ SEM) in petioles (A) and roots (B) of water hyacinth for low density and high density with or without rooting in the sediment at the end and start of the experiment. Different lower case letters indicate significant differences between treatments including the start of the experiment ( $P < 0.01$ ).

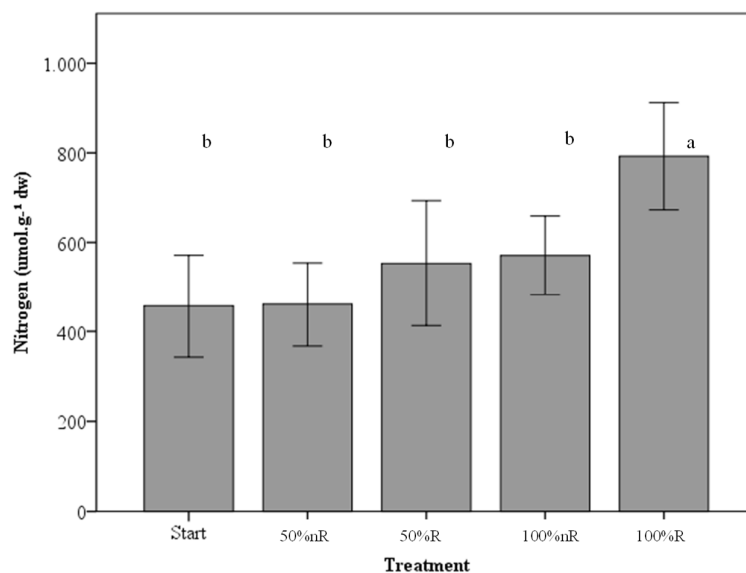

Figure S2. Mean N concentrations ( $\pm$ SEM) in petioles of water hyacinth for low density and high density with or without rooting in the sediment at the end and start of the experiment. Different lower case letters indicate significant differences between treatments including the start of the experiment ( $P < 0.001$ ).

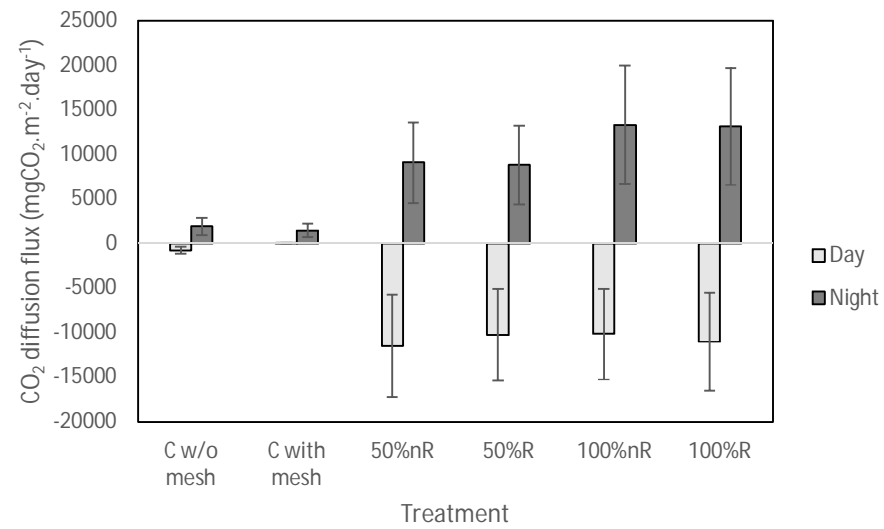

Figure S3. CO<sub>2</sub> fluxes ( $\pm$ SD) during the day and night periods for controls (C), low coverage (50%), and high coverage (100%) of water hyacinth with (R) or without rooting (nR) in the sediment. Negative numbers refer to uptake.
